# Supplementary material for: Characterization of the Mechanisms of Daptomycin Resistance among Gram-Positive Bacterial Pathogens by Multidimensional Lipidomics
Source: PubMed Central journal article supplement (PMC5729219; doi:10.1128/msphere.00492-17), 2017-12-13

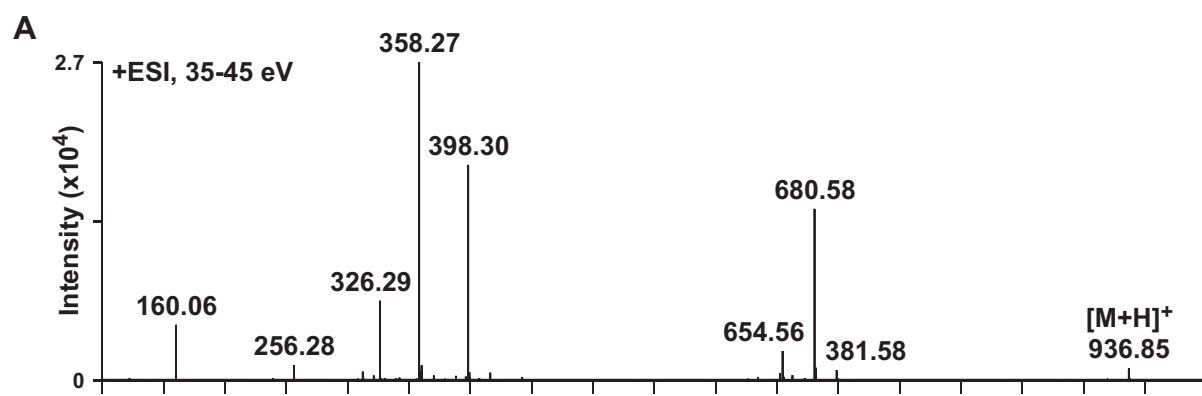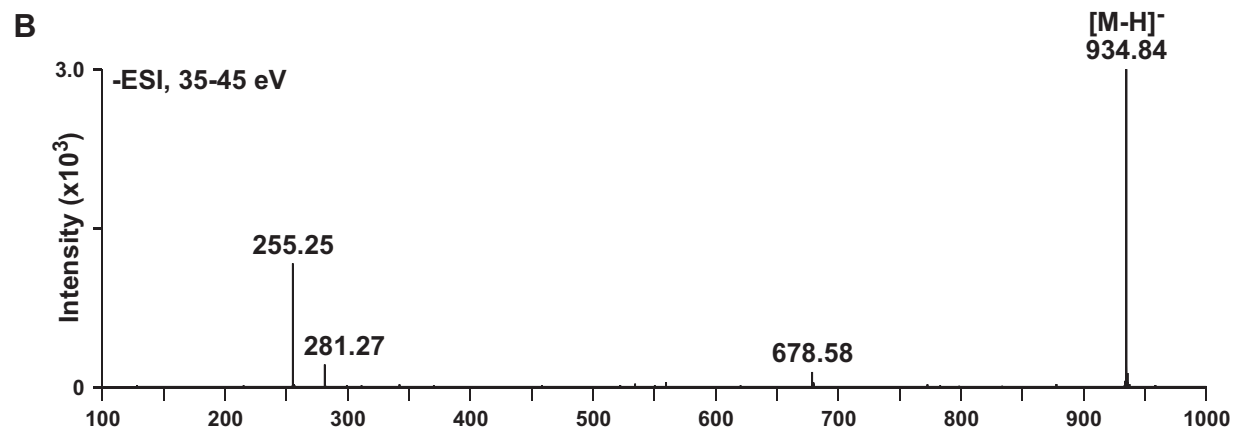

Supplement: sph006172426sf7.pdf [file sph006172426sf7.pdf]
