# Supplementary material for: Characterization of the Mechanisms of Daptomycin Resistance among Gram-Positive Bacterial Pathogens by Multidimensional Lipidomics
Source: PubMed Central journal article supplement (PMC5729219; doi:10.1128/msphere.00492-17), 2017-12-13
Supplement: sph006172426st2.pdf [file sph006172426st2.pdf]

*E. faecalis* S613 and R712

| Putative ID | Ret. Time (min) | Adduct                            | <i>m/z</i> | Accuracy (ppm) | CCS <sub>cal</sub> <sup>a</sup> (Å <sup>2</sup> ) | RSD (%) | CCS <sub>ref</sub> (Å <sup>2</sup> ) | ΔCCS (% diff) |
|-------------|-----------------|-----------------------------------|------------|----------------|---------------------------------------------------|---------|--------------------------------------|---------------|
| DGDG 28:1   | 1.14            | [M+Na] <sup>+</sup>               | 857.526    | 2.0            | 289.5                                             | 0.09    |                                      |               |
| DGDG 30:2   | 1.09            | [M+NH <sub>4</sub> ] <sup>+</sup> | 878.585    | 1.5            | 295.4                                             | 0.01    |                                      |               |
| DGDG 30:1   | 1.10            | [M+NH <sub>4</sub> ] <sup>+</sup> | 880.603    | 3.5            | 298.4                                             | 0.02    |                                      |               |
| DGDG 30:0   | 1.09            | [M+NH <sub>4</sub> ] <sup>+</sup> | 882.614    | -1.2           | 302.4                                             | 0.02    |                                      |               |
| DGDG 30:2   | 1.12            | [M+Na] <sup>+</sup>               | 883.537    | -2.6           | 291.7                                             | 0.05    |                                      |               |
| DGDG 30:1   | 1.11            | [M+Na] <sup>+</sup>               | 885.557    | 1.8            | 295.5                                             | 0.02    |                                      |               |
| DGDG 30:0   | 1.12            | [M+Na] <sup>+</sup>               | 887.569    | -1.8           | 299.6                                             | 0.10    |                                      |               |
| DGDG 30:1   | 1.12            | [M+K] <sup>+</sup>                | 901.532    | 2.7            | 298.1                                             | 0.02    |                                      |               |
| DGDG 32:2   | 1.06            | [M+NH <sub>4</sub> ] <sup>+</sup> | 906.619    | 4.3            | 302.2                                             | 0.04    |                                      |               |
| DGDG 32:1   | 1.07            | [M+NH <sub>4</sub> ] <sup>+</sup> | 908.637    | 6.1            | 305.4                                             | 0.04    |                                      |               |
| DGDG 32:0   | 1.06            | [M+NH <sub>4</sub> ] <sup>+</sup> | 910.642    | -5.1           | 307.4                                             | 0.03    |                                      |               |
| DGDG 32:2   | 1.10            | [M+Na] <sup>+</sup>               | 911.573    | 2.6            | 298.0                                             | 0.04    |                                      |               |
| DGDG 32:1   | 1.10            | [M+Na] <sup>+</sup>               | 913.587    | 1.0            | 302.5                                             | 0.02    |                                      |               |
| DGDG 32:0   | 1.11            | [M+Na] <sup>+</sup>               | 915.597    | -6.0           | 304.7                                             | 0.05    |                                      |               |
| DGDG 32:1   | 1.12            | [M+K] <sup>+</sup>                | 929.563    | 3.1            | 305.1                                             | 0.01    |                                      |               |
| DGDG 34:3   | 1.03            | [M+NH <sub>4</sub> ] <sup>+</sup> | 932.631    | 0.1            | 305.8                                             | 0.07    | 305.3 <sup>c</sup>                   | 0.2           |
| DGDG 34:2   | 1.03            | [M+NH <sub>4</sub> ] <sup>+</sup> | 934.653    | 6.5            | 309.0                                             | 0.06    | 307.5 <sup>c</sup>                   | 0.5           |
| DGDG 34:1   | 1.03            | [M+NH <sub>4</sub> ] <sup>+</sup> | 936.667    | 5.0            | 311.6                                             | 0.06    |                                      |               |
| DGDG 34:2   | 1.02            | [M+Na] <sup>+</sup>               | 939.606    | 4.0            | 305.2                                             | 0.03    | 306.5 <sup>c</sup>                   | -0.4          |
| DGDG 34:1   | 1.02            | [M+Na] <sup>+</sup>               | 941.618    | 0.6            | 309.0                                             | 0.06    |                                      |               |
| DGDG 34:1   | 1.18            | [M+K] <sup>+</sup>                | 957.604    | 12.4           | 311.3                                             | 0.03    |                                      |               |
| DGDG 35:2   | 1.03            | M+NH <sub>4</sub> <sup>+</sup>    | 948.664    | 2.4            | 315.0                                             | 0.08    |                                      |               |
| DGDG 35:2   | 1.02            | [M+Na] <sup>+</sup>               | 953.620    | 2.6            | 311.5                                             | 0.06    |                                      |               |
| DGDG 35:1   | 1.04            | M+NH <sub>4</sub> <sup>+</sup>    | 950.675    | -2.4           | 317.4                                             | 0.12    |                                      |               |
| DGDG 36:2   | 1.01            | [M+NH <sub>4</sub> ] <sup>+</sup> | 962.682    | 4.4            | 315.2                                             | 0.07    |                                      |               |
| DGDG 36:2   | 0.99            | [M+Na] <sup>+</sup>               | 967.635    | 1.9            | 312.4                                             | 0.08    |                                      |               |
| DGDG 36:2   | 0.99            | [M+K] <sup>+</sup>                | 983.610    | 2.5            | 315.3                                             | 0.11    |                                      |               |
| PG p31:2    | 1.40            | [M-H] <sup>-</sup>                | 687.461    | -0.6           | 256.8                                             | 0.02    |                                      |               |
| PG p33:2    | 1.37            | [M-H] <sup>-</sup>                | 715.493    | 2.7            | 263.4                                             | 0.01    |                                      |               |
| PG p34:3    | 1.35            | [M-H] <sup>-</sup>                | 727.492    | 1.4            | 264.8                                             | 0.02    |                                      |               |
| PG p34:2    | 1.37            | [M-H] <sup>-</sup>                | 729.508    | 1.4            | 266.6                                             | 0.00    |                                      |               |
| PG 28:1     | 2.42            | [M-H] <sup>-</sup>                | 663.424    | -1.1           | 251.2                                             | 0.13    |                                      |               |
| PG 28:0     | 2.43            | [M-H] <sup>-</sup>                | 665.438    | -2.9           | 253.1                                             | 0.15    |                                      |               |
| PG 30:2     | 2.37            | [M-H] <sup>-</sup>                | 689.440    | -0.1           | 255.0                                             | 0.10    |                                      |               |
| PG 30:1     | 2.40            | [M-H] <sup>-</sup>                | 691.457    | 2.3            | 257.1                                             | 0.03    |                                      |               |
| PG 30:0     | 2.40            | [M-H] <sup>-</sup>                | 693.470    | -2.0           | 258.9                                             | 0.03    |                                      |               |
| PG 31:2     | 2.28            | [M-H] <sup>-</sup>                | 703.456    | 0.0            | 257.9                                             | 0.07    |                                      |               |
| PG 31:1     | 2.38            | [M-H] <sup>-</sup>                | 705.471    | -0.4           | 260.2                                             | 0.04    |                                      |               |
| PG 32:2     | 2.30            | [M-H] <sup>-</sup>                | 717.473    | 2.4            | 261.4                                             | 0.06    | 261.0 <sup>b</sup>                   | 0.1           |
| PG 32:1     | 2.32            | [M-H] <sup>-</sup>                | 719.489    | 2.8            | 263.3                                             | 0.04    | 262.5 <sup>b</sup>                   | 0.3           |
| PG 32:0     | 2.32            | [M-H] <sup>-</sup>                | 721.501    | -2.5           | 264.9                                             | 0.08    | 263.5 <sup>b</sup>                   | 0.5           |
| PG 33:2     | 2.29            | [M-H] <sup>-</sup>                | 731.487    | 0.4            | 264.5                                             | 0.02    |                                      |               |
| PG 33:1     | 2.31            | [M-H] <sup>-</sup>                | 733.503    | 1.2            | 267.0                                             | 0.06    |                                      |               |
| PG 34:2     | 2.25            | [M-H] <sup>-</sup>                | 745.503    | 0.3            | 268.1                                             | 0.03    | 267.4 <sup>b</sup>                   | 0.2           |

|              |      |                    |         |       |       |      |                    |     |
|--------------|------|--------------------|---------|-------|-------|------|--------------------|-----|
| PG 34:1      | 2.27 | [M-H] <sup>-</sup> | 747.518 | 0.0   | 269.9 | 0.03 | 268.9 <sup>b</sup> | 0.4 |
| PG 34:0      | 2.26 | [M-H] <sup>-</sup> | 749.529 | -6.4  | 270.8 | 0.08 | 269.0 <sup>b</sup> | 0.7 |
| PG 35:2      | 2.23 | [M-H] <sup>-</sup> | 759.519 | 1.6   | 271.4 | 0.03 |                    |     |
| PG 35:1      | 2.26 | [M-H] <sup>-</sup> | 761.535 | 1.2   | 273.2 | 0.07 |                    |     |
| PG 36:2      | 2.19 | [M-H] <sup>-</sup> | 773.533 | -0.5  | 274.9 | 0.07 | 274.3 <sup>b</sup> | 0.2 |
| PG 36:1      | 2.19 | [M-H] <sup>-</sup> | 775.544 | -7.6  | 275.7 | 0.07 | 275.7 <sup>b</sup> | 0.0 |
| PG 37:1      | 2.18 | [M-H] <sup>-</sup> | 787.549 | -1.3  | 278.0 | 0.05 |                    |     |
| LysylPG 30:1 | 7.73 | [M-H] <sup>-</sup> | 821.569 | -4.7  | 287.0 | 0.01 |                    |     |
| LysylPG 30:0 | 7.75 | [M+H] <sup>+</sup> | 823.584 | -4.2  | 290.4 | 0.02 |                    |     |
| LysylPG 32:2 | 7.68 | [M+H] <sup>+</sup> | 847.589 | -9.6  | 290.8 | 0.04 |                    |     |
| LysylPG 32:1 | 7.70 | [M+H] <sup>+</sup> | 849.601 | -5.2  | 293.5 | 0.03 |                    |     |
| LysylPG 34:2 | 7.63 | [M+H] <sup>+</sup> | 875.625 | -15.3 | 298.4 | 0.09 |                    |     |
| LysylPG 34:1 | 7.66 | [M+H] <sup>+</sup> | 877.632 | -4.9  | 299.6 | 0.03 |                    |     |
| LysylPG 35:2 | 7.63 | [M+H] <sup>+</sup> | 889.632 | -4.8  | 300.8 | 0.02 |                    |     |
| LysylPG 35:1 | 7.66 | [M+H] <sup>+</sup> | 891.647 | -4.0  | 303.5 | 0.01 |                    |     |
| LysylPG 36:2 | 7.61 | [M+H] <sup>+</sup> | 903.647 | -3.7  | 302.8 | 0.00 |                    |     |

***S. aureus* N315 and N315-D8**

| Putative ID | Ret. Time (min) | Adduct                            | <i>m/z</i> | Accuracy (ppm) | CCS <sub>cal</sub> <sup>a</sup> (Å <sup>2</sup> ) | RSD (%) | CCS <sub>ref</sub> (Å <sup>2</sup> ) | ΔCCS (% diff) |
|-------------|-----------------|-----------------------------------|------------|----------------|---------------------------------------------------|---------|--------------------------------------|---------------|
| DGDG 29:0   | 1.17            | [M+NH <sub>4</sub> ] <sup>+</sup> | 868.600    | 0.6            | 298.3                                             | 0.03    |                                      |               |
| DGDG 30:0   | 1.17            | [M+NH <sub>4</sub> ] <sup>+</sup> | 882.621    | 6.3            | 301.8                                             | 0.04    |                                      |               |
| DGDG 30:0   | 1.17            | [M+Na] <sup>+</sup>               | 887.573    | 2.0            | 299.6                                             | 0.03    |                                      |               |
| DGDG 31:0   | 1.15            | [M+NH <sub>4</sub> ] <sup>+</sup> | 896.633    | 2.3            | 305.4                                             | 0.05    |                                      |               |
| DGDG 31:0   | 1.15            | [M+Na] <sup>+</sup>               | 901.587    | 0.2            | 303.4                                             | 0.05    |                                      |               |
| DGDG 32:0   | 1.14            | [M+NH <sub>4</sub> ] <sup>+</sup> | 910.652    | 5.7            | 308.5                                             | 0.08    |                                      |               |
| DGDG 32:0   | 1.14            | [M+Na] <sup>+</sup>               | 915.603    | 1.3            | 306.7                                             | 0.07    |                                      |               |
| DGDG 33:0   | 1.11            | [M+NH <sub>4</sub> ] <sup>+</sup> | 924.665    | 2.7            | 311.5                                             | 0.06    |                                      |               |
| DGDG 33:0   | 1.11            | [M+Na] <sup>+</sup>               | 929.618    | 0.4            | 309.0                                             | 0.07    |                                      |               |
| DGDG 34:0   | 1.10            | [M+NH <sub>4</sub> ] <sup>+</sup> | 938.680    | 2.2            | 314.2                                             | 0.08    |                                      |               |
| DGDG 34:0   | 1.09            | [M+Na] <sup>+</sup>               | 943.634    | 0.1            | 311.8                                             | 0.08    |                                      |               |
| DGDG 35:0   | 1.07            | [M+NH <sub>4</sub> ] <sup>+</sup> | 952.695    | 1.5            | 317.1                                             | 0.06    |                                      |               |
| DGDG 35:0   | 1.07            | [M+Na] <sup>+</sup>               | 957.650    | 0.4            | 314.2                                             | 0.07    |                                      |               |
| DGDG 36:0   | 1.05            | [M+NH <sub>4</sub> ] <sup>+</sup> | 966.709    | -0.1           | 326.8                                             | 0.01    |                                      |               |
| PG p29:1    | 1.59            | [M-H] <sup>-</sup>                | 661.445    | 1.4            | 252.2                                             | 0.04    |                                      |               |
| PG p30:1    | 1.55            | [M-H] <sup>-</sup>                | 675.461    | 1.5            | 255.3                                             | 0.04    |                                      |               |
| PG p31:1    | 1.53            | [M-H] <sup>-</sup>                | 689.477    | 2.3            | 258.5                                             | 0.03    |                                      |               |
| PG p32:1    | 1.50            | [M-H] <sup>-</sup>                | 703.492    | 1.3            | 262.1                                             | 0.07    |                                      |               |
| PG p33:1    | 1.49            | [M-H] <sup>-</sup>                | 717.508    | 1.4            | 265.1                                             | 0.07    |                                      |               |
| PG p34:1    | 1.45            | [M-H] <sup>-</sup>                | 731.523    | 0.8            | 268.6                                             | 0.03    |                                      |               |
| PG 29:0     | 2.41            | [M-H] <sup>-</sup>                | 679.457    | 2.2            | 255.2                                             | 0.02    |                                      |               |
| PG 30:0     | 2.39            | [M-H] <sup>-</sup>                | 693.480    | 13.1           | 258.7                                             | 0.05    |                                      |               |
| PG 31:0     | 2.33            | [M-H] <sup>-</sup>                | 707.492    | 7.3            | 262.0                                             | 0.07    |                                      |               |
| PG 32:0     | 2.30            | [M-H] <sup>-</sup>                | 721.512    | 13.6           | 265.1                                             | 0.08    | 263.5 <sup>b</sup>                   | 0.6           |
| PG 33:0     | 2.25            | [M-H] <sup>-</sup>                | 735.524    | 7.5            | 268.6                                             | 0.07    |                                      |               |
| PG 34:0     | 2.21            | [M-H] <sup>-</sup>                | 749.538    | 5.6            | 271.6                                             | 0.05    | 269.0 <sup>b</sup>                   | 1.0           |
| PG 35:0     | 2.16            | [M-H] <sup>-</sup>                | 763.552    | 2.6            | 275.0                                             | 0.04    |                                      |               |
| PG 36:0     | 2.13            | [M-H] <sup>-</sup>                | 777.565    | -0.1           | 277.9                                             | 0.06    |                                      |               |

|              |      |                    |         |      |       |      |                    |      |
|--------------|------|--------------------|---------|------|-------|------|--------------------|------|
| PA 30:0      | 6.46 | [M-H] <sup>-</sup> | 619.434 | 0.5  | 244.9 | 0.01 |                    |      |
| PA 31:0      | 6.45 | [M-H] <sup>-</sup> | 633.450 | 0.0  | 248.2 | 0.03 |                    |      |
| PA 32:0      | 6.44 | [M-H] <sup>-</sup> | 647.467 | -1.7 | 251.1 | 0.01 |                    |      |
| PA 33:0      | 6.42 | [M-H] <sup>-</sup> | 661.481 | 0.6  | 254.5 | 0.02 |                    |      |
| PA 34:0      | 6.43 | [M-H] <sup>-</sup> | 675.499 | -2.2 | 257.6 | 0.01 |                    |      |
| PA 35:0      | 6.43 | [M-H] <sup>-</sup> | 689.513 | -0.9 | 261.0 | 0.02 |                    |      |
| PA 36:0      | 6.42 | [M-H] <sup>-</sup> | 703.529 | -0.3 | 264.1 | 0.01 |                    |      |
| LysylPG 28:0 | 7.70 | [M+H] <sup>+</sup> | 795.550 | 1.3  | 284.7 | 0.04 |                    |      |
| LysylPG 29:0 | 7.66 | [M+H] <sup>+</sup> | 809.566 | 0.7  | 287.8 | 0.03 |                    |      |
| LysylPG 30:0 | 7.64 | [M+H] <sup>+</sup> | 823.582 | 1.9  | 290.9 | 0.01 |                    |      |
| LysylPG 31:0 | 7.60 | [M+H] <sup>+</sup> | 837.598 | 2.0  | 293.9 | 0.03 |                    |      |
| LysylPG 32:0 | 7.57 | [M+H] <sup>+</sup> | 851.613 | 0.9  | 296.8 | 0.02 | 297.0 <sup>c</sup> | -0.1 |
| LysylPG 33:0 | 7.54 | [M+H] <sup>+</sup> | 865.629 | 1.0  | 299.8 | 0.03 |                    |      |
| LysylPG 34:0 | 7.52 | [M+H] <sup>+</sup> | 879.644 | 0.8  | 302.5 | 0.02 |                    |      |
| LysylPG 35:0 | 7.49 | [M+H] <sup>+</sup> | 893.661 | 1.7  | 305.4 | 0.04 |                    |      |
| LysylPG 36:0 | 7.59 | [M+H] <sup>+</sup> | 907.677 | -9.2 | 308.7 | 0.02 |                    |      |

***C. striatum* W40308 and W49297**

| Putative ID      | Ret. Time (min) | Adduct                            | <i>m/z</i> | Accuracy (ppm) | CCS <sub>cal</sub> <sup>a</sup> (Å <sup>2</sup> ) | RSD (%) | CCS <sub>ref</sub> (Å <sup>2</sup> ) | ΔCCS (% diff) |
|------------------|-----------------|-----------------------------------|------------|----------------|---------------------------------------------------|---------|--------------------------------------|---------------|
| 1.36_834.5291n   | 1.45            | [M+Na] <sup>+</sup>               | 857.523    |                | 292.8                                             | 0.01    |                                      |               |
| 1.36_834.5291n   | 1.53            | [M+K] <sup>+</sup>                | 873.497    |                | 294.1                                             | 0.02    |                                      |               |
| GlcADG 16:0-18:1 | 2.25            | [M+NH <sub>4</sub> ] <sup>+</sup> | 788.596    | -10.4          | 290.1                                             | 0.07    |                                      |               |
| GlcADG 16:0-18:1 | 2.27            | [M+Na] <sup>+</sup>               | 793.551    | -9.6           | 288.1                                             | 0.07    |                                      |               |
| GlcADG 16:0-16:0 | 2.33            | [M+NH <sub>4</sub> ] <sup>+</sup> | 762.578    | -6.6           | 286.0                                             | 0.07    |                                      |               |
| GlcADG 16:0-16:0 | 2.35            | [M+Na] <sup>+</sup>               | 767.532    | -5.6           | 282.6                                             | 0.03    |                                      |               |
| PI 16:0-18:1     | 3.74            | [M+Na] <sup>+</sup>               | 859.540    | -11.1          | 295.4                                             | 0.06    |                                      |               |
| PI 16:0-16:0     | 3.82            | [M+Na] <sup>+</sup>               | 833.521    | -7.3           | 289.5                                             | 0.03    |                                      |               |
| AlaPG 34:1       | 4.51            | [M+H] <sup>+</sup>                | 820.581    | -13.5          | 291.7                                             | 0.07    |                                      |               |
| AlaPG 34:1       | 4.50            | [M+Na] <sup>+</sup>               | 842.560    | -9.9           | 294.3                                             | 0.10    |                                      |               |
| AlaPG 34:1       | 4.49            | [M+K] <sup>+</sup>                | 858.530    | -4.9           | 293.6                                             | 0.11    |                                      |               |
| 0.90_934.7546m/z | 0.97            | [M-H] <sup>-</sup>                | 934.759    |                | 318.2                                             | 0.02    |                                      |               |
| 1.36_834.5291n   | 1.35            | [M-H] <sup>-</sup>                | 833.527    |                | 282.8                                             | 0.02    |                                      |               |
| PG 16:0-18:1     | 2.06            | [M-H] <sup>-</sup>                | 747.521    | -4.0           | 269.2                                             | 0.03    | 268.9 <sup>b</sup>                   | 0.1           |
| PG 16:0-16:0     | 2.15            | [M-H] <sup>-</sup>                | 721.505    | -3.0           | 264.5                                             | 0.01    | 263.5 <sup>b</sup>                   | 0.4           |
| GlcADG 16:0-18:1 | 2.29            | [M-H] <sup>-</sup>                | 769.554    | -8.4           | 272.7                                             | 0.03    |                                      |               |
| GlcADG 16:0-16:0 | 2.38            | [M-H] <sup>-</sup>                | 743.530    | 2.4            | 267.9                                             | 0.02    |                                      |               |
| PI 16:0-18:1     | 3.71            | [M-H] <sup>-</sup>                | 835.541    | -7.7           | 285.5                                             | 0.02    | 283.7 <sup>b</sup>                   | 0.6           |
| PI 16:0-16:0     | 3.75            | [M-H] <sup>-</sup>                | 809.523    | -5.3           | 280.9                                             | 0.05    |                                      |               |
| PA 16:0-18:1     | 6.28            | [M-H] <sup>-</sup>                | 673.484    | -3.9           | 256.3                                             | 0.01    | 254.7 <sup>b</sup>                   | 0.6           |
| PA 16:0-16:0     | 6.49            | [M-H] <sup>-</sup>                | 647.469    | -5.7           | 251.4                                             | 0.00    |                                      |               |
