# Supplementary material for: Characterization of the Mechanisms of Daptomycin Resistance among Gram-Positive Bacterial Pathogens by Multidimensional Lipidomics
Source: PubMed Central journal article supplement (PMC5729219; doi:10.1128/msphere.00492-17), 2017-12-13
Supplement: sph006172426st3.pdf [file sph006172426st3.pdf]

| Putative ID | Ret. Time (min) | <i>m/z</i> | Adduct                            | Fatty Acids <sup>a</sup> | Accuracy (ppm) | S613 (x10 <sup>3</sup> ) | Fold (R712/S613) | <i>P</i> -value <sup>b</sup> |
|-------------|-----------------|------------|-----------------------------------|--------------------------|----------------|--------------------------|------------------|------------------------------|
| MGDG 32:2   | 0.55            | 749.521    | [M+Na] <sup>+</sup>               |                          | 4.7            | 11.2 ± 0.6               | 1.4              | 0.0016                       |
| MGDG 32:0   | 0.59            | 748.592    | [M+NH <sub>4</sub> ] <sup>+</sup> |                          | -1.9           | 18.8 ± 0.6               | 1.2              | 0.0083                       |
| MGDG 34:2   | 0.59            | 772.596    | [M+NH <sub>4</sub> ] <sup>+</sup> |                          | 2.9            | 15 ± 0.3                 | 1.2              | 0.015                        |
| MGDG 34:1   | 0.52            | 779.570    | [M+Na] <sup>+</sup>               |                          | 7.4            | 198.5 ± 8.6              | 1.0              | 0.42                         |
| MGDG 35:1   | 0.59            | 788.624    | [M+NH <sub>4</sub> ] <sup>+</sup> |                          | -0.7           | 14.4 ± 0.2               | 1.4              | 0.0069                       |
| MGDG 36:2   | 0.59            | 800.626    | [M+NH <sub>4</sub> ] <sup>+</sup> |                          | 2.0            | 20.6 ± 0.5               | 1.3              | 0.0072                       |
| MGDG 37:2   | 0.59            | 814.635    | [M+NH <sub>4</sub> ] <sup>+</sup> |                          | -6.3           | 2.4 ± 0.1                | 1.8              | 3.0 x 10 <sup>-4</sup>       |
| DGDG 30:1   | 1.05            | 880.601    | [M+NH <sub>4</sub> ] <sup>+</sup> |                          | 1.3            | 39.1 ± 4.2               | 1.4              | 0.010                        |
| DGDG 32:2   | 1.02            | 906.616    | [M+NH <sub>4</sub> ] <sup>+</sup> | 18:1, 16:1, 14:1         | 1.0            | 46.6 ± 4.5               | 1.3              | 0.012                        |
| DGDG 32:1   | 1.02            | 908.633    | [M+NH <sub>4</sub> ] <sup>+</sup> | 14:0, 18:1, 16:0, 16:1   | 1.6            | 218.1 ± 25.3             | 1.2              | 0.054                        |
| DGDG 34:1   | 0.98            | 936.665    | [M+NH <sub>4</sub> ] <sup>+</sup> | 18:1, 16:0               | 3.3            | 674.1 ± 75.7             | 1.7              | 9.4 x 10 <sup>-4</sup>       |
| DGDG 35:2   | 0.93            | 953.620    | [M+Na] <sup>+</sup>               |                          | 2.4            | 115.7 ± 12.7             | 0.9              | 0.21                         |
| DGDG 35:1   | 0.98            | 950.677    | [M+NH <sub>4</sub> ] <sup>+</sup> | 19:1, 16:0               | -1.0           | 137.1 ± 14.5             | 1.0              | 0.83                         |
| DGDG 36:2   | 0.93            | 962.679    | [M+NH <sub>4</sub> ] <sup>+</sup> | 18:1                     | 1.2            | 148.4 ± 15.8             | 2.4              | 9.3 x 10 <sup>-5</sup>       |
| DGDG 37:2   | 0.93            | 976.692    | [M+NH <sub>4</sub> ] <sup>+</sup> |                          | -1.8           | 20.9 ± 2.2               | 1.8              | 7.7 x 10 <sup>-4</sup>       |
| DGDG 38:2   | 0.93            | 990.704    | [M+NH <sub>4</sub> ] <sup>+</sup> |                          | -5.4           | 2.8 ± 0.3                | 2.3              | 2.9 x 10 <sup>-4</sup>       |
| PG p31:2    | 1.36            | 687.464    | [M-H] <sup>-</sup>                |                          | 5.5            | 10.2 ± 0.8               | 0.7              | 0.0063                       |
| PG p33:2    | 1.33            | 715.491    | [M-H] <sup>-</sup>                |                          | -0.6           | 27.2 ± 0.9               | 0.8              | 0.0083                       |
| PG p34:3    | 1.33            | 727.492    | [M-H] <sup>-</sup>                |                          | 0.4            | 3.6 ± 0.1                | 0.6              | 9.3 x 10 <sup>-4</sup>       |
| PG p34:2    | 1.33            | 729.506    | [M-H] <sup>-</sup>                |                          | -1.6           | 11.1 ± 0.6               | 0.8              | 0.024                        |
| PG p35:3    | 1.29            | 741.506    | [M-H] <sup>-</sup>                |                          | -2.1           | 4.7 ± 0.1                | 0.7              | 0.0022                       |
| PG 26:0     | 2.38            | 637.407    | [M-H] <sup>-</sup>                |                          | -2.9           | 1.3 ± 0.1                | 0.3              | 1.6 x 10 <sup>-4</sup>       |
| PG 28:1     | 2.29            | 663.423    | [M-H] <sup>-</sup>                |                          | -1.7           | 5.9 ± 0.4                | 0.3              | 1.8 x 10 <sup>-4</sup>       |
| PG 28:0     | 2.29            | 665.439    | [M-H] <sup>-</sup>                |                          | -2.0           | 9.9 ± 0.7                | 0.2              | 1.4 x 10 <sup>-4</sup>       |
| PG 30:2     | 2.22            | 689.441    | [M-H] <sup>-</sup>                |                          | 1.5            | 6.7 ± 0.3                | 0.4              | 2.4 x 10 <sup>-5</sup>       |
| PG 30:1     | 2.22            | 691.456    | [M-H] <sup>-</sup>                |                          | 0.1            | 35.8 ± 1.4               | 0.4              | 3.2 x 10 <sup>-5</sup>       |
| PG 30:0     | 2.22            | 693.471    | [M-H] <sup>-</sup>                |                          | -0.7           | 37.9 ± 2.5               | 0.4              | 3.2 x 10 <sup>-4</sup>       |
| PG 32:2     | 2.14            | 717.481    | [M-H] <sup>-</sup>                | 14:1, 16:1, 18:1         | 13.5           | 32.7 ± 0.8               | 0.6              | 2.2 x 10 <sup>-4</sup>       |
| PG 32:1     | 2.14            | 719.489    | [M-H] <sup>-</sup>                | 14:0, 16:0, 16:1, 18:1   | 2.5            | 138.6 ± 4.7              | 0.5              | 4.0 x 10 <sup>-5</sup>       |
| PG 33:2     | 2.10            | 731.496    | [M-H] <sup>-</sup>                |                          | 12.7           | 20.7 ± 0.5               | 0.5              | 3.1 x 10 <sup>-5</sup>       |
| PG 33:1     | 2.14            | 733.505    | [M-H] <sup>-</sup>                |                          | 3.5            | 88.6 ± 3.4               | 0.5              | 1.9 x 10 <sup>-4</sup>       |
| PG 34:2     | 2.07            | 745.515    | [M-H] <sup>-</sup>                | 16:1, 18:1               | 16.9           | 81.7 ± 1.3               | 0.7              | 0.0013                       |
| PG 34:1     | 2.07            | 747.521    | [M-H] <sup>-</sup>                | 16:0, 18:1               | 4.1            | 261.2 ± 8.3              | 0.5              | 5.9 x 10 <sup>-5</sup>       |
| PG 35:2     | 2.01            | 759.519    | [M-H] <sup>-</sup>                |                          | 0.5            | 66.8 ± 1.8               | 0.5              | 3.4 x 10 <sup>-5</sup>       |
| PG 35:1     | 2.07            | 761.535    | [M-H] <sup>-</sup>                | 16:0, 19:1               | 2.0            | 184.1 ± 5.8              | 0.6              | 2.8 x 10 <sup>-4</sup>       |
| PG 36:2     | 2.01            | 773.534    | [M-H] <sup>-</sup>                | 18:1                     | 0.7            | 89.9 ± 1.4               | 0.4              | 4.7 x 10 <sup>-6</sup>       |
| CL 60:2     | 4.74            | 645.430    | [M-2H] <sup>-2</sup>              |                          | -3.4           | 1.2 ± 0.1                | 0.4              | 3.8 x 10 <sup>-4</sup>       |
| CL 60:1     | 4.81            | 646.437    | [M-2H] <sup>-2</sup>              |                          | -4.2           | 1.7 ± 0.2                | 0.4              | 8.5 x 10 <sup>-4</sup>       |
| CL 62:3     | 4.65            | 658.440    | [M-2H] <sup>-2</sup>              |                          | 0.1            | 1.4 ± 0                  | 0.4              | 4.5 x 10 <sup>-5</sup>       |
| CL 62:2     | 4.74            | 659.446    | [M-2H] <sup>-2</sup>              |                          | -2.7           | 8.5 ± 0.4                | 0.4              | 6.4 x 10 <sup>-5</sup>       |

|              |      |         |                      |                                    |      |             |     |                        |
|--------------|------|---------|----------------------|------------------------------------|------|-------------|-----|------------------------|
| CL 64:3      | 4.70 | 672.455 | [M-2H] <sup>-2</sup> |                                    | -0.8 | 4.6 ± 0     | 0.4 | 1.5 x 10 <sup>-6</sup> |
| CL 64:2      | 4.81 | 673.462 | [M-2H] <sup>-2</sup> |                                    | -2.3 | 16.6 ± 0.7  | 0.4 | 4.7 x 10 <sup>-5</sup> |
| CL 65:3      | 4.81 | 679.474 | [M-2H] <sup>-2</sup> |                                    | 16.2 | 10.6 ± 0.2  | 0.7 | 1.3 x 10 <sup>-4</sup> |
| CL 66:4      | 4.70 | 685.465 | [M-2H] <sup>-2</sup> |                                    | 2.8  | 3.3 ± 0.1   | 0.4 | 7.7 x 10 <sup>-6</sup> |
| CL 66:2      | 4.86 | 687.477 | [M-2H] <sup>-2</sup> | 18:1, 16:0, 16:1, 14:0             | -2.2 | 35.4 ± 2    | 0.3 | 9.9 x 10 <sup>-5</sup> |
| CL 67:4      | 4.81 | 692.483 | [M-2H] <sup>-2</sup> |                                    | 16.7 | 5.7 ± 0.2   | 0.4 | 7.2 x 10 <sup>-5</sup> |
| CL 67:3      | 4.89 | 693.485 | [M-2H] <sup>-2</sup> | 16:0, 18:1, 16:1, 14:0, 19:1, 14:1 | 8.6  | 25.4 ± 0.6  | 0.6 | 9.6 x 10 <sup>-5</sup> |
| CL 68:3      | 4.86 | 700.486 | [M-2H] <sup>-2</sup> | 18:1, 16:0, 16:1                   | -0.7 | 81.4 ± 2.4  | 0.3 | 1.5 x 10 <sup>-5</sup> |
| CL 69:4      | 4.81 | 706.491 | [M-2H] <sup>-2</sup> |                                    | 5.7  | 5.5 ± 0.1   | 0.5 | 7.5 x 10 <sup>-5</sup> |
| CL 69:3      | 4.86 | 707.492 | [M-2H] <sup>-2</sup> | 16:0, 18:1, 16:1, 19:1             | -3.9 | 34.2 ± 0.9  | 0.5 | 9.1 x 10 <sup>-5</sup> |
| CL 70:3      | 4.89 | 714.500 | [M-2H] <sup>-2</sup> | 18:1, 16:0, 16:1, 19:1             | -2.8 | 32.7 ± 0.6  | 0.4 | 1.3 x 10 <sup>-5</sup> |
| CL 71:3      | 4.96 | 721.503 | [M-2H] <sup>-2</sup> |                                    | -9.5 | 9.6 ± 0.2   | 0.5 | 6.2 x 10 <sup>-5</sup> |
| CL 72:4      | 4.86 | 727.508 | [M-2H] <sup>-2</sup> |                                    | -3.2 | 5.1 ± 0.1   | 0.4 | 3.4 x 10 <sup>-5</sup> |
| LysylPG 30:1 | 7.72 | 821.565 | [M+H] <sup>+</sup>   |                                    | -0.6 | 5.1 ± 0.7   | 0.3 | 0.0022                 |
| LysylPG 30:0 | 7.72 | 823.580 | [M+H] <sup>+</sup>   |                                    | -1.3 | 4.4 ± 0.8   | 0.4 | 0.0086                 |
| LysylPG 32:2 | 7.72 | 847.582 | [M+H] <sup>+</sup>   | 16:1, 18:1                         | 1.2  | 4 ± 0.6     | 0.3 | 0.0024                 |
| LysylPG 32:1 | 7.72 | 849.597 | [M+H] <sup>+</sup>   | 14:0, 16:0, 18:1, 16:1             | 0.3  | 26.7 ± 4.6  | 0.3 | 0.0043                 |
| LysylPG 34:2 | 7.68 | 875.614 | [M+H] <sup>+</sup>   | 16:1, 18:1                         | 2.6  | 11.3 ± 1.7  | 0.3 | 0.0026                 |
| LysylPG 34:1 | 7.68 | 877.628 | [M+H] <sup>+</sup>   | 16:0, 18:1                         | 0.5  | 60.2 ± 10.3 | 0.2 | 0.0033                 |
| LysylPG 35:2 | 7.65 | 889.627 | [M+H] <sup>+</sup>   |                                    | -0.6 | 5.7 ± 0.8   | 0.4 | 0.0024                 |
| LysylPG 35:1 | 7.68 | 891.642 | [M+H] <sup>+</sup>   | 16:0, 19:1                         | -1.5 | 17.9 ± 3    | 0.5 | 0.011                  |
| LysylPG 36:2 | 7.65 | 903.643 | [M+H] <sup>+</sup>   | 18:1                               | -0.7 | 11.5 ± 1.8  | 0.3 | 0.0030                 |
