# Supplementary material for: Characterization of the Mechanisms of Daptomycin Resistance among Gram-Positive Bacterial Pathogens by Multidimensional Lipidomics
Source: PubMed Central journal article supplement (PMC5729219; doi:10.1128/msphere.00492-17), 2017-12-13
Supplement: sph006172426st4.pdf [file sph006172426st4.pdf]

| Putative ID | Ret. Time (min) | <i>m/z</i> | Adduct                            | Fatty Acids <sup>a</sup> | Accuracy (ppm) | N315 (x10 <sup>3</sup> ) | Fold (N315-D8/N315) | <i>P</i> -value <sup>b</sup> |
|-------------|-----------------|------------|-----------------------------------|--------------------------|----------------|--------------------------|---------------------|------------------------------|
| FA 14:0     | 0.77            | 227.200    | [M-H] <sup>-</sup>                |                          | -6.9           | 9.1 ± 0.3                | 0.4                 | 2.5 x 10 <sup>-5</sup>       |
| FA 15:0     | 0.77            | 241.218    | [M-H] <sup>-</sup>                |                          | 1.7            | 24.3 ± 0.7               | 1.2                 | 0.0067                       |
| FA 16:0     | 0.77            | 255.234    | [M-H] <sup>-</sup>                |                          | 3.2            | 71.0 ± 0.7               | 0.8                 | 1.8 x 10 <sup>-5</sup>       |
| FA 17:0     | 0.74            | 269.248    | [M-H] <sup>-</sup>                |                          | -3.8           | 14.1 ± 0.4               | 1.8                 | 6.9 x 10 <sup>-5</sup>       |
| FA 18:1     | 0.71            | 281.248    | [M-H] <sup>-</sup>                |                          | -0.7           | 34.8 ± 0.9               | 0.6                 | 5.7 x 10 <sup>-5</sup>       |
| FA 18:0     | 0.74            | 283.266    | [M-H] <sup>-</sup>                |                          | 4.9            | 103.5 ± 1.2              | 0.8                 | 5.1 x 10 <sup>-5</sup>       |
| FA 19:0     | 0.74            | 297.282    | [M-H] <sup>-</sup>                |                          | 7.5            | 11.5 ± 0.2               | 10.4                | 6.3 x 10 <sup>-7</sup>       |
| FA 20:0     | 0.71            | 311.299    | [M-H] <sup>-</sup>                |                          | 10.3           | 46.0 ± 1.0               | 1.6                 | 3.9 x 10 <sup>-5</sup>       |
| FA 21:0     | 0.71            | 325.315    | [M-H] <sup>-</sup>                |                          | 10.2           | 2.1 ± 0.1                | 20.2                | 2.0 x 10 <sup>-8</sup>       |
| FA 22:0     | 0.67            | 339.326    | [M-H] <sup>-</sup>                |                          | -3.5           | 4.0 ± 0.2                | 3.8                 | 2.2 x 10 <sup>-7</sup>       |
| FA 23:0     | 0.67            | 353.341    | [M-H] <sup>-</sup>                |                          | -4.3           | 1.2 ± 0.0                | 7.8                 | 5.9 x 10 <sup>-9</sup>       |
| MGDG 31:0   | 0.59            | 734.576    | [M+NH <sub>4</sub> ] <sup>+</sup> |                          | -1.7           | 9.5 ± 0.3                | 0.8                 | 0.0017                       |
| MGDG 32:0   | 0.59            | 748.594    | [M+NH <sub>4</sub> ] <sup>+</sup> |                          | 0.5            | 10.4 ± 0.3               | 1.7                 | 2.3 x 10 <sup>-5</sup>       |
| MGDG 33:0   | 0.59            | 762.610    | [M+NH <sub>4</sub> ] <sup>+</sup> |                          | 0.9            | 21.6 ± 0.9               | 0.4                 | 3.5 x 10 <sup>-5</sup>       |
| MGDG 34:0   | 0.59            | 776.624    | [M+NH <sub>4</sub> ] <sup>+</sup> |                          | -0.7           | 5.7 ± 0.2                | 3.6                 | 1.7 x 10 <sup>-7</sup>       |
| MGDG 35:0   | 0.59            | 790.640    | [M+NH <sub>4</sub> ] <sup>+</sup> |                          | -0.2           | 12.0 ± 0.3               | 1.3                 | 8.8 x 10 <sup>-5</sup>       |
| MGDG 36:0   | 0.59            | 804.652    | [M+NH <sub>4</sub> ] <sup>+</sup> |                          | -4.4           | 2.8 ± 0.1                | 3.4                 | 4.2 x 10 <sup>-7</sup>       |
| DGDG 28:0   | 1.17            | 854.583    | [M+NH <sub>4</sub> ] <sup>+</sup> |                          | -0.3           | 10.0 ± 0.2               | 0.9                 | 0.0032                       |
| DGDG 29:0   | 1.14            | 868.599    | [M+NH <sub>4</sub> ] <sup>+</sup> |                          | -0.5           | 40.8 ± 0.3               | 0.5                 | 1.6 x 10 <sup>-7</sup>       |
| DGDG 30:0   | 1.14            | 882.616    | [M+NH <sub>4</sub> ] <sup>+</sup> | 15:0                     | 1.6            | 122.3 ± 1.2              | 1.1                 | 3.8 x 10 <sup>-4</sup>       |
| DGDG 31:0   | 1.14            | 896.633    | [M+NH <sub>4</sub> ] <sup>+</sup> | 16:0, 15:0, 17:0, 14:0   | 2.2            | 225.2 ± 2.0              | 0.3                 | 4.6 x 10 <sup>-8</sup>       |
| DGDG 32:0   | 1.08            | 910.649    | [M+NH <sub>4</sub> ] <sup>+</sup> | 17:0, 15:0               | 3.0            | 264.1 ± 0.8              | 1.7                 | 2.5 x 10 <sup>-9</sup>       |
| DGDG 33:0   | 1.08            | 924.665    | [M+NH <sub>4</sub> ] <sup>+</sup> | 18:0, 15:0               | 3.8            | 900.6 ± 3.1              | 0.5                 | 5.8 x 10 <sup>-9</sup>       |
| DGDG 34:0   | 1.05            | 938.680    | [M+NH <sub>4</sub> ] <sup>+</sup> | 19:0, 15:0               | 2.2            | 166.0 ± 1.5              | 2.8                 | 1.9 x 10 <sup>-9</sup>       |
| DGDG 35:0   | 1.02            | 952.697    | [M+NH <sub>4</sub> ] <sup>+</sup> | 20:0, 15:0               | 3.7            | 551.9 ± 6.0              | 1.1                 | 7.6 x 10 <sup>-5</sup>       |
| DGDG 36:0   | 0.98            | 966.708    | [M+NH <sub>4</sub> ] <sup>+</sup> | 21:0, 15:0, 17:0, 19:0   | -0.5           | 44.3 ± 1.0               | 6.1                 | 6.6 x 10 <sup>-9</sup>       |
| DGDG 37:0   | 1.02            | 980.723    | [M+NH <sub>4</sub> ] <sup>+</sup> |                          | -1.0           | 10.5 ± 0.2               | 2.8                 | 3.9 x 10 <sup>-8</sup>       |
| DGDG 38:0   | 1.02            | 994.735    | [M+NH <sub>4</sub> ] <sup>+</sup> |                          | -5.1           | 2.4 ± 0.0                | 4.4                 | 1.2 x 10 <sup>-7</sup>       |
| PG p29:1    | 1.39            | 661.448    | [M-H] <sup>-</sup>                |                          | 4.0            | 93.6 ± 11.5              | 0.1                 | 4.1 x 10 <sup>-4</sup>       |
| PG p30:1    | 1.36            | 675.463    | [M-H] <sup>-</sup>                |                          | 3.3            | 68.2 ± 8.3               | 0.02                | 3.4 x 10 <sup>-4</sup>       |
| PG p31:1    | 1.36            | 689.478    | [M-H] <sup>-</sup>                |                          | 2.8            | 69.8 ± 8.3               | 0.2                 | 7.6 x 10 <sup>-4</sup>       |
| PG p32:1    | 1.33            | 703.495    | [M-H] <sup>-</sup>                |                          | 3.7            | 112.4 ± 12.7             | 0.1                 | 3.1 x 10 <sup>-4</sup>       |
| PG p33:1    | 1.33            | 717.508    | [M-H] <sup>-</sup>                |                          | -0.1           | 33.5 ± 4.4               | 0.4                 | 0.0033                       |
| PG p34:1    | 1.29            | 731.523    | [M-H] <sup>-</sup>                |                          | 0.1            | 60.7 ± 6.8               | 0.2                 | 4.7 x 10 <sup>-4</sup>       |
| PG 24:0     | 2.45            | 609.378    | [M-H] <sup>-</sup>                |                          | 1.1            | 27.7 ± 3.7               | 0.01                | 5.0 x 10 <sup>-4</sup>       |
| PG 25:0     | 2.41            | 623.396    | [M-H] <sup>-</sup>                |                          | 4.5            | 76.6 ± 8.6               | 0.1                 | 3.6 x 10 <sup>-4</sup>       |
| PG 26:0     | 2.38            | 637.408    | [M-H] <sup>-</sup>                |                          | -0.8           | 16.6 ± 2.1               | 0.1                 | 4.7 x 10 <sup>-4</sup>       |
| PG 27:0     | 2.32            | 651.424    | [M-H] <sup>-</sup>                |                          | -0.6           | 19.1 ± 2.2               | 0.2                 | 5.3 x 10 <sup>-4</sup>       |
| PG 28:0     | 2.29            | 665.441    | [M-H] <sup>-</sup>                |                          | 1.2            | 57.9 ± 5.5               | 0.1                 | 1.6 x 10 <sup>-4</sup>       |
| PG 29:0     | 2.26            | 679.457    | [M-H] <sup>-</sup>                |                          | 2.2            | 140.7 ± 11.4             | 0.04                | 7.1 x 10 <sup>-5</sup>       |

|              |      |         |                      |                                    |      |              |        |                        |
|--------------|------|---------|----------------------|------------------------------------|------|--------------|--------|------------------------|
| PG 30:0      | 2.22 | 693.475 | [M-H] <sup>-</sup>   | 15:0, 14:0, 16:0                   | 5.9  | 503.0 ± 38.3 | 0.1    | 8.2 x 10 <sup>-5</sup> |
| PG 31:0      | 2.17 | 707.490 | [M-H] <sup>-</sup>   | 15:0, 16:0                         | 4.5  | 598.9 ± 48.9 | 0.0    | 7.8 x 10 <sup>-5</sup> |
| PG 32:0      | 2.17 | 721.506 | [M-H] <sup>-</sup>   | 15:0, 17:0, 14:0, 18:0             | 4.7  | 519.9 ± 39.2 | 0.3    | 2.6 x 10 <sup>-4</sup> |
| PG 33:0      | 2.10 | 735.521 | [M-H] <sup>-</sup>   | 15:0, 18:0                         | 4.4  | 807.9 ± 59.2 | 0.1    | 6.2 x 10 <sup>-5</sup> |
| PG 34:0      | 2.01 | 749.535 | [M-H] <sup>-</sup>   | 15:0, 19:0, 14:0, 20:0             | 1.8  | 226.6 ± 15.7 | 0.8    | 0.011                  |
| PG 35:0      | 2.01 | 763.552 | [M-H] <sup>-</sup>   | 15:0, 20:0                         | 3.8  | 413.5 ± 23.9 | 0.3    | 5.6 x 10 <sup>-5</sup> |
| PG 36:0      | 1.98 | 777.563 | [M-H] <sup>-</sup>   | 15:0, 21:0                         | -2.2 | 15.9 ± 1.1   | 3.6    | 2.3 x 10 <sup>-5</sup> |
| CL 55:0      | 4.81 | 612.406 | [M-2H] <sup>-2</sup> |                                    | -4.0 | 1.4 ± 0.2    | 0.001  | 2.5 x 10 <sup>-4</sup> |
| CL 56:0      | 4.81 | 619.414 | [M-2H] <sup>-2</sup> | 15:0, 18:0, 16:0, 14:0, 17:0       | -4.0 | 2.1 ± 0.2    | 0.0001 | 2.5 x 10 <sup>-4</sup> |
| CL 57:0      | 4.86 | 626.421 | [M-2H] <sup>-2</sup> | 15:0, 14:0, 18:0, 17:0, 16:0       | -4.6 | 1.6 ± 0.2    | 0.02   | 1.5 x 10 <sup>-4</sup> |
| CL 58:0      | 4.86 | 633.430 | [M-2H] <sup>-2</sup> | 15:0, 18:0, 14:0, 20:0, 13:0       | -3.7 | 2.3 ± 0.2    | 0.005  | 4.9 x 10 <sup>-5</sup> |
| CL 59:0      | 4.89 | 640.436 | [M-2H] <sup>-2</sup> |                                    | -6.1 | 1.2 ± 0.1    | 0.1    | 6.4 x 10 <sup>-5</sup> |
| CL 60:0      | 4.89 | 647.445 | [M-2H] <sup>-2</sup> | 15:0, 14:0, 16:0, 18:0             | -4.0 | 1.9 ± 0.1    | 0.03   | 4.5 x 10 <sup>-5</sup> |
| CL 61:0      | 4.93 | 654.453 | [M-2H] <sup>-2</sup> | 15:0, 16:0, 14:0                   | -3.6 | 1.7 ± 0.0    | 0.03   | 8.6 x 10 <sup>-7</sup> |
| CL 62:0      | 5.01 | 661.461 | [M-2H] <sup>-2</sup> | 15:0, 16:0, 18:0, 14:0, 17:0, 13:0 | -3.7 | 2.1 ± 0.1    | 0.1    | 1.4 x 10 <sup>-5</sup> |
| CL 63:0      | 5.05 | 668.468 | [M-2H] <sup>-2</sup> | 15:0, 14:0, 18:0                   | -3.9 | 2.7 ± 0.2    | 0.0    | 1.7 x 10 <sup>-5</sup> |
| PA 29:0      | 6.20 | 605.416 | [M-H] <sup>-</sup>   |                                    | -4.7 | 2.4 ± 0.1    | 0.3    | 6.5 x 10 <sup>-5</sup> |
| PA 30:0      | 6.41 | 619.434 | [M-H] <sup>-</sup>   | 15:0                               | -1.4 | 14.1 ± 0.6   | 0.9    | 0.27                   |
| PA 31:0      | 6.17 | 633.448 | [M-H] <sup>-</sup>   | 16:0, 15:0                         | -1.9 | 12.3 ± 2.1   | 0.3    | 0.0040                 |
| PA 32:0      | 6.44 | 647.463 | [M-H] <sup>-</sup>   | 17:0, 15:0                         | -3.8 | 20.4 ± 1.5   | 2.6    | 3.9 x 10 <sup>-4</sup> |
| PA 33:0      | 6.36 | 661.479 | [M-H] <sup>-</sup>   | 18:0, 15:0                         | -3.3 | 17.7 ± 4.4   | 0.5    | 0.069                  |
| PA 34:0      | 6.41 | 675.494 | [M-H] <sup>-</sup>   | 19:0, 15:0                         | -4.2 | 12.4 ± 1.5   | 3.2    | 0.0082                 |
| PA 35:0      | 6.36 | 689.509 | [M-H] <sup>-</sup>   | 20:0, 15:0                         | -5.7 | 6.4 ± 1.9    | 1.9    | 0.085                  |
| PA 36:0      | 6.41 | 703.525 | [M-H] <sup>-</sup>   | 21:0, 15:0                         | -4.8 | 1.2 ± 0.2    | 7.3    | 0.020                  |
| LysylPG 24:0 | 7.91 | 739.488 | [M+H] <sup>+</sup>   |                                    | 1.8  | 16.7 ± 0.3   | 0.1    | 1.3 x 10 <sup>-7</sup> |
| LysylPG 25:0 | 7.87 | 753.505 | [M+H] <sup>+</sup>   |                                    | 2.8  | 50.4 ± 0.6   | 0.2    | 1.0 x 10 <sup>-7</sup> |
| LysylPG 26:0 | 7.84 | 767.519 | [M+H] <sup>+</sup>   |                                    | 0.9  | 7.3 ± 0.1    | 0.2    | 3.4 x 10 <sup>-7</sup> |
| LysylPG 27:0 | 7.84 | 781.534 | [M+H] <sup>+</sup>   |                                    | 0.6  | 8.8 ± 0.3    | 0.3    | 5.7 x 10 <sup>-6</sup> |
| LysylPG 28:0 | 7.80 | 795.550 | [M+H] <sup>+</sup>   |                                    | 1.2  | 29.8 ± 0.8   | 0.1    | 9.6 x 10 <sup>-7</sup> |
| LysylPG 29:0 | 7.75 | 809.567 | [M+H] <sup>+</sup>   |                                    | 2.2  | 80.2 ± 2.0   | 0.04   | 6.5 x 10 <sup>-7</sup> |
| LysylPG 30:0 | 7.72 | 823.586 | [M+H] <sup>+</sup>   | 15:0                               | 6.2  | 318.1 ± 6.1  | 0.1    | 3.9 x 10 <sup>-7</sup> |
| LysylPG 31:0 | 7.68 | 837.601 | [M+H] <sup>+</sup>   | 15:0, 16:0                         | 5.0  | 328.6 ± 5.3  | 0.1    | 1.7 x 10 <sup>-7</sup> |
| LysylPG 32:0 | 7.68 | 851.615 | [M+H] <sup>+</sup>   | 15:0, 17:0                         | 4.1  | 266.3 ± 5.3  | 0.5    | 5.6 x 10 <sup>-6</sup> |
| LysylPG 33:0 | 7.65 | 865.631 | [M+H] <sup>+</sup>   | 15:0, 18:0                         | 4.1  | 420.9 ± 5.2  | 0.1    | 2.4 x 10 <sup>-7</sup> |
| LysylPG 34:0 | 7.65 | 879.644 | [M+H] <sup>+</sup>   | 15:0, 19:0                         | 0.2  | 92.8 ± 2.5   | 1.2    | 4.0 x 10 <sup>-4</sup> |
| LysylPG 35:0 | 7.60 | 893.661 | [M+H] <sup>+</sup>   | 15:0, 20:0                         | 1.8  | 164.1 ± 2.4  | 0.3    | 4.8 x 10 <sup>-7</sup> |
| LysylPG 36:0 | 7.60 | 907.669 | [M+H] <sup>+</sup>   |                                    | -5.9 | 6.6 ± 0.4    | 3.1    | 2.3 x 10 <sup>-6</sup> |
